# Supplementary material for: ID1 and ID3 are Negative Regulators of TGFβ2-Induced Ocular Hypertension and Compromised Aqueous Humor Outflow Facility in Mice
Source: PubMed Central journal article supplement — Invest Ophthalmol Vis Sci. 2021 May 3;62(6):3. doi: 10.1167/iovs.62.6.3 (PMC8107646; doi:10.1167/iovs.62.6.3), 2021-05-03
Supplement: iovs-62-6-3_s001.pdf [file iovs-62-6-3_s001.pdf]

Supplemental Table 1.

| <b><u>Ad5 Vector</u></b>               | <b><u>Target</u></b>    | <b><u>Over-Expression</u></b> | <b><u>Knockdown Expression</u></b> |
|----------------------------------------|-------------------------|-------------------------------|------------------------------------|
| Ad5-TGF $\beta$ 2 <sup>C226/228S</sup> | Activated TGF $\beta$ 2 | Yes                           | No                                 |
| Ad5-ID1                                | ID1                     | Yes                           | No                                 |
| Ad5-ID1shRNA                           | ID1                     | No                            | Yes                                |
| Ad5-ID3                                | ID3                     | Yes                           | No                                 |
| Ad5-ID3shRNA                           | ID3                     | No                            | Yes                                |
